# Supplementary material
Source: PubMed Central journal article supplement (PMC4418620)
Supplement: CJP-2015-vol60-April-Supplement-S26-S34-eTable1.pdf [file CJP-2015-vol60-April-Supplement-S26-S34-eTable1.pdf]

Potvin S, Zhornitsky S, Stip E. Antipsychotic-Induced Changes in Blood Levels of Leptin in Schizophrenia: A Meta-Analysis. *CanJPsychiatry* 2015;60(3 Suppl 2):S26–S34.

**eTable 1: Study characteristics**

| <b>Authors</b>              | <b>Population</b>      | <b>Age / sex ratio</b>                                                                       | <b>Baseline drug status</b> | <b>State</b> | <b>Drugs</b>                                        | <b>Weeks</b> | <b>Sample</b> | <b>Metabolic markers</b>  | <b>Outcomes</b> |
|-----------------------------|------------------------|----------------------------------------------------------------------------------------------|-----------------------------|--------------|-----------------------------------------------------|--------------|---------------|---------------------------|-----------------|
| Ak et al. <sup>28</sup>     | 8 (psychotic disorder) | 21.5 years; 100% of males                                                                    | Drug-free                   | In-patient   | Olan                                                | 4            | Plasma        | TG, glucose, HDL, LDL, TC | Leptin          |
| Atmaca et al. <sup>26</sup> | 21 (SCZ)               | 30.4 y; NS                                                                                   | Drug-free                   | NS           | Olan                                                | 6            | Plasma        | TG, glucose               | Leptin          |
| Atmaca et al. <sup>34</sup> | 53 (SCZ)               | Cloz: 31.3 y; 38.5%;<br>Olan: 29.6 y; 46.2%;<br>Quet: 30.1 y; 42.9%;<br>Risp : 27.9 y; 53.8% | Drug-free                   | In-patient   | Cloz (13),<br>Olan (13),<br>Quet (14),<br>Risp (13) | 6            | Serum         | TG                        | Leptin          |
| Baptista et                 | 60 (SCZ)               | 46 y; 56.7%                                                                                  | Antipsychotic               | NS           | Olan                                                | 16           | Serum         | Glucose,                  | Leptin          |

|                                  |             |               |               |            |                        |    |        |                                    |                 |
|----------------------------------|-------------|---------------|---------------|------------|------------------------|----|--------|------------------------------------|-----------------|
| al. <sup>58</sup>                |             |               |               |            |                        |    |        | insulin                            |                 |
| Basoglu et al. <sup>59</sup>     | 22 (SCZ)    | 21.2 y; 100%  | Drug-naive    | In-patient | Olan                   | 6  | Plasma | TG, glucose, HDL, LDL              | Ghrelin, leptin |
| Brandl et al. <sup>60</sup>      | 20 (SCZ-SA) | NS; NS        | NS            | NS         | Mixed                  | 2  | Plasma | None                               | Leptin          |
| Chiu et al. <sup>36</sup>        | 26 (SCZ)    | 37.3 y; 69.2% | Drug-free     | In-patient | Olan (13)<br>Risp (13) | 2  | Plasma | TG, glucose, HDL, LDL, TC, insulin | Leptin          |
| Ebenbichler et al. <sup>56</sup> | 14 (SCZ)    | NS; NS        | Drug-Free     | In-patient | Olan                   | 10 | Serum  | None                               | Leptin          |
| Fitzgerald et al. <sup>61</sup>  | 22 (SCZ)    | 34.6 y; 0%    | Antipsychotic | Mixed      | Mixed                  | 12 | Plasma | None                               | Leptin          |
| Hosojima et al. <sup>27</sup>    | 13 (SCZ)    | 37 y; 69.2%   | Drug-Free     | In-patient | Olan                   | 4  | Serum  | Glucose, insulin                   | Ghrelin, leptin |
| Kim et al. <sup>62</sup>         | 24 (SCZ)    | 34.3 y; 100%  | Drug-Free     | In-        | Olan                   | 24 | Plasma | TG, glucose,                       | Ghrelin,        |

|                                 |                   |                                                                |               |             |                                    |    |        |                                          |                    |
|---------------------------------|-------------------|----------------------------------------------------------------|---------------|-------------|------------------------------------|----|--------|------------------------------------------|--------------------|
|                                 |                   |                                                                |               | patient     |                                    |    |        | HDL, LDL,<br>TC                          | leptin             |
| Kivircik et al. <sup>30</sup>   | 19 (SCZ)          | 37.4 y; 42.1%                                                  | Antipsychotic | Mixed       | Cloz                               | 10 | Serum  | None                                     | Leptin             |
| Kraus et al. <sup>33</sup><br>* | 32 (SCZ)          | Cloz : 37 y; 36.4%<br>Halo : 36 y; 46.2%<br>Olan : 26 y; 37.5% | NS            | In-patient  | Cloz (11)<br>Halo (13)<br>Olan (8) | 4  | Plasma | None                                     | Leptin             |
| Murashita et al. <sup>63</sup>  | 7 (SCZ)           | 46.3 y; 57.1%                                                  | Antipsychotic | Out-patient | Olan                               | 24 | Serum  | TG, glucose,<br>HDL, LDL,<br>TC, insulin | Ghrelin,<br>leptin |
| Ozguven et al. <sup>40</sup>    | 30 (SCZ-spectrum) | Olan : 38.8 y; 0%<br>Quet : 33.9 y ; 0%                        | NS            | In-patient  | Olan (15)<br>Quet (15)             | 6  | Serum  | TG, glucose,<br>LDL, HDL,<br>TC          | Leptin             |
| Perez-Iglesias et               | 70 (SCZ-spectrum) | 28.6 y; 62.9%                                                  | Drug-naive    | Mixed       | Halo (21)<br>Olan (23)             | 52 | Serum  | Insulin                                  | Ghrelin,<br>leptin |

|                               |             |                                             |               |             |                        |    |        |                                    |                 |
|-------------------------------|-------------|---------------------------------------------|---------------|-------------|------------------------|----|--------|------------------------------------|-----------------|
| al. <sup>38</sup>             |             |                                             |               |             | Risp (26)              |    |        |                                    |                 |
| Popovic et al. <sup>37</sup>  | 13 (SCZ)    | 28.8 y; 50%                                 | Antipsychotic | NS          | Mixed                  | 12 | Serum  | Glucose, insulin                   | Ghrelin, leptin |
| Raposo et al. <sup>41</sup>   | 34 (SCZ)    | 35 y; 100%                                  | Drug-Free     | In-patient  | Halo (16)<br>Olan (18) | 36 | Serum  | TG, HDL, LDL, TC                   | Leptin          |
| Sarandol et al. <sup>31</sup> | 40 (SCZ)    | 34.9 y; 45%                                 | Mixed         | NS          | Mixed                  | 6  | Serum  | TG, HDL, LDL, TC                   | Leptin          |
| Smith et al. <sup>39</sup>    | 46 (SCZ-SA) | Olan : 41.2 y; 100%<br>Risp : 42.5 y; 95.7% | Antipsychotic | In-patient  | Olan (23)<br>Risp (23) | 20 | Serum  | TG, HDL, LDL, TC                   | Ghrelin, leptin |
| Stip et al. <sup>64</sup>     | 15 (SCZ)    | 35.8 y; 73.3%                               | Antipsychotic | Out-patient | Olan                   | 16 | Plasma | TG, glucose, HDL, LDL, TC, insulin | Ghrelin, leptin |
| Tanaka et al. <sup>32</sup>   | 28 (SCZ)    | 30.3 y; 64.3%                               | Drug-Free     | In-patient  | Olan                   | 16 | Serum  | TG, glucose, HDL, LDL, TC, insulin | Ghrelin, leptin |

|                                         |                   |               |               |             |       |    |        |                                    |                 |
|-----------------------------------------|-------------------|---------------|---------------|-------------|-------|----|--------|------------------------------------|-----------------|
| Templeman et al. <sup>29</sup>          | 73 (SCZ)          | 25.3 y; 75.3% | Drug-naive    | NS          | Mixed | 36 | Plasma | None                               | Leptin          |
| Theisen et al. <sup>55</sup>            | 11 (SCZ-spectrum) | 31 y; 45.5%   | Antipsychotic | In-patient  | Cloz  | 10 | Serum  | None                               | Ghrelin, leptin |
| Tschoner et al. <sup>35</sup>           | 28 (SCZ)          | 34.2 y; 57.1% | Drug-Free     | Out-patient | Mixed | 4  | Plasma | Glucose, HDL, LDL, TC, insulin     | Leptin          |
| Venkatasubramanian et al. <sup>65</sup> | 27 (SCZ)          | 32 y; 52.6%   | Drug-naive    | NS          | Mixed | 12 | Serum  | None                               | Leptin          |
| Yanik et al. <sup>66</sup>              | 17 (SCZ)          | 22.4 y; 100%  | Drug-naive    | In-patient  | Risp  | 4  | Plasma | None                               | Leptin          |
| Zhang et al. <sup>67</sup>              | 46 (SCZ)          | 26.5 y; 58.7% | Drug-naive    | In-patient  | Mixed | 10 | Plasma | TG, glucose, HDL, LDL, TC, insulin | Leptin          |

CLOZ=clozapine; DM=diabetes mellitus; NS=non-specified; OLAN=olanzapine; QUET=quetiapine; RISP=risperidone;  
SCZ=schizophrenia; SA=schizo-affective disorder; SCZ-S=schizophrenia-spectrum; TG= triglycerides; TC = total cholesterol; \* This  
is the only multiple-arm study that was not a randomized trial
